# Supplementary material for: A unique ligand effect in Pt-based core–shell nanocubes to boost oxygen reduction electrocatalysis
Source: Royal Society of Chemistry journal article supplement (doi:10.1039/d1ta05730h), 2021-01-01
Supplement: d1ta05730h1.pdf [file d1ta05730h1.pdf]

## Supporting Information

### Unique Ligand Effect in Pt-Based Core-Shell Nanocubes to Boost Oxygen Reduction Electrocatalysis

Xingqiao Wu,<sup>a,‡</sup> XinKai Chen,<sup>a,b,‡</sup> Xiao Li,<sup>a</sup> Yucong Yan,<sup>a,d</sup> Jingbo Huang,<sup>a</sup> Junjie Li,<sup>a</sup> Rong Shen,<sup>a</sup> He Tian<sup>a,b,\*</sup>, Deren Yang<sup>a</sup> and Hui Zhang<sup>a,c,\*</sup>

<sup>a</sup>State Key Laboratory of Silicon Materials, School of Materials Science and Engineering, Zhejiang University, Hangzhou, Zhejiang 310027, People's Republic of China

<sup>b</sup>State Key Laboratory of Silicon Materials and Center of Electron Microscopy, School of Materials Science & Engineering, Zhejiang University, Hangzhou, Zhejiang 310027, People's Republic of China

<sup>c</sup>Institute of Advanced Semiconductors, Hangzhou Innovation Center, Zhejiang University, Hangzhou, Zhejiang 310027, People's Republic of China

<sup>d</sup>BTR New Material Group CO., LTD., GuangMing District, Shenzhen 518106, China.

<sup>‡</sup>These authors contributed equally

\*Corresponding author. E-mail: msezhanghui@zju.edu.cn, hetian@zju.edu.cn.

## 1. Materials and Computational Method.

### 1.1. Chemicals.

Palladium(II) acetylacetonate ( $\text{Pd}(\text{acac})_2$ , 99%), lead(II) acetylacetonate ( $\text{Pb}(\text{acac})_2$ , technical grade), chloroplatinic(IV) acid ( $\text{H}_2\text{PtCl}_6 \cdot x\text{H}_2\text{O}$ , 99.9%), n-butylamine (98%), potassium hydroxide (KOH, 99.99%) were all purchased from Sigma Aldrich. Commercial Pt/C (20 wt%) was purchased from Alfa Aesar. Oleylamine (OAm, 80%-90%) was purchased from Aladdin. Ethanol, cyclohexane and chloroform were purchased from Sinopharm Chemical Reagent. All the chemicals and materials were used as received. All aqueous solutions were prepared using ultrapure water with a resistivity of  $18.2 \text{ M}\Omega \cdot \text{cm}$ .

### 1.2. Computational Method.

All the density functional theory (DFT) calculations were performed by using Vienna Ab-initio Simulation Package[1,2] (VASP) under the Projected Augmented Wave[3] (PAW) method. The revised Perdew-Burke-Ernzerhof (RPBE) functional was used to describe the exchange and correlation effects, since it has proved to provide useful trend in computing adsorption energies.[4-6] In all the calculations, the cut-off energy was set to be 500 eV. The (100) surface was simulated to represent the catalytic interface. The Monkhorst-Pack grid [7] were set to be  $3 \times 3 \times 1$  and  $6 \times 6 \times 1$  for computing the adsorption energy and d-band centre, respectively. A 15 Å vacuum layer was applied in z-direction of the slab models, preventing the slabs from vertical interactions.

The oxygen adsorption energy ( $\Delta E_O$ ) was defined as:

$$\Delta E_O = E_{\text{slab} + O} - E_{\text{slab}} - E_O$$

where  $E_{\text{slab} + O}$  is the energy of slab model with an adsorbed oxygen atom,  $E_{\text{slab}}$  is the energy

of the clean slab, and  $E_O$  is the energy of an oxygen atom referenced as (H<sub>2</sub>O–H<sub>2</sub>). Under this definition, a smaller value of  $\Delta E_O$  indicates a stronger adsorption.

## 2. Supporting Figures and Tables.

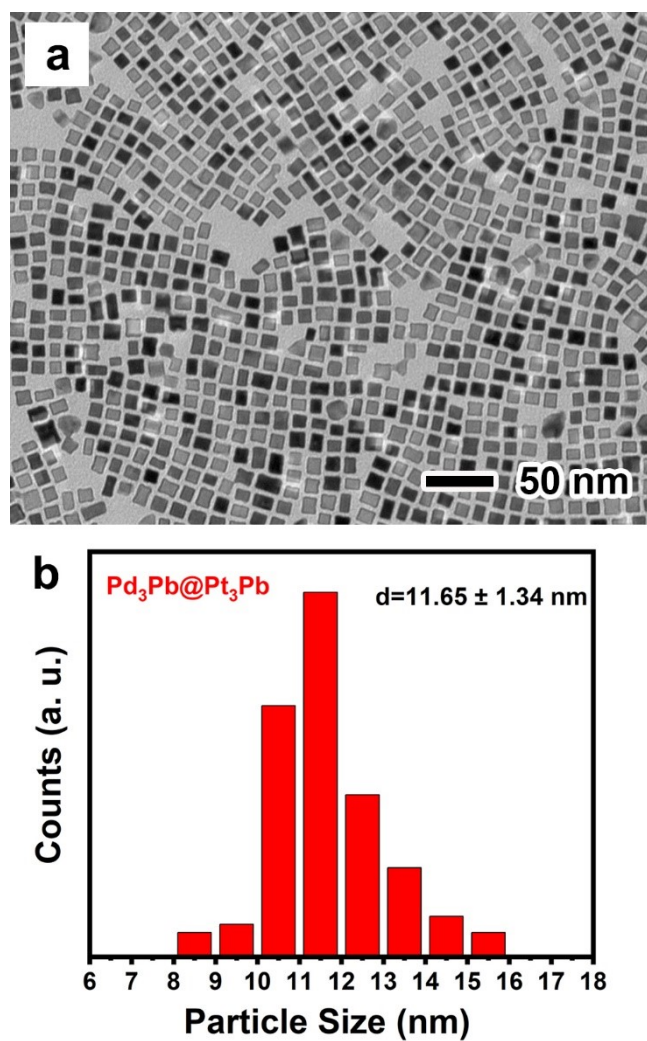

**Fig. S1.** (a) TEM images and (b) corresponding size distribution of the Pd<sub>3</sub>Pb@Pt<sub>3</sub>Pb nanocubes.

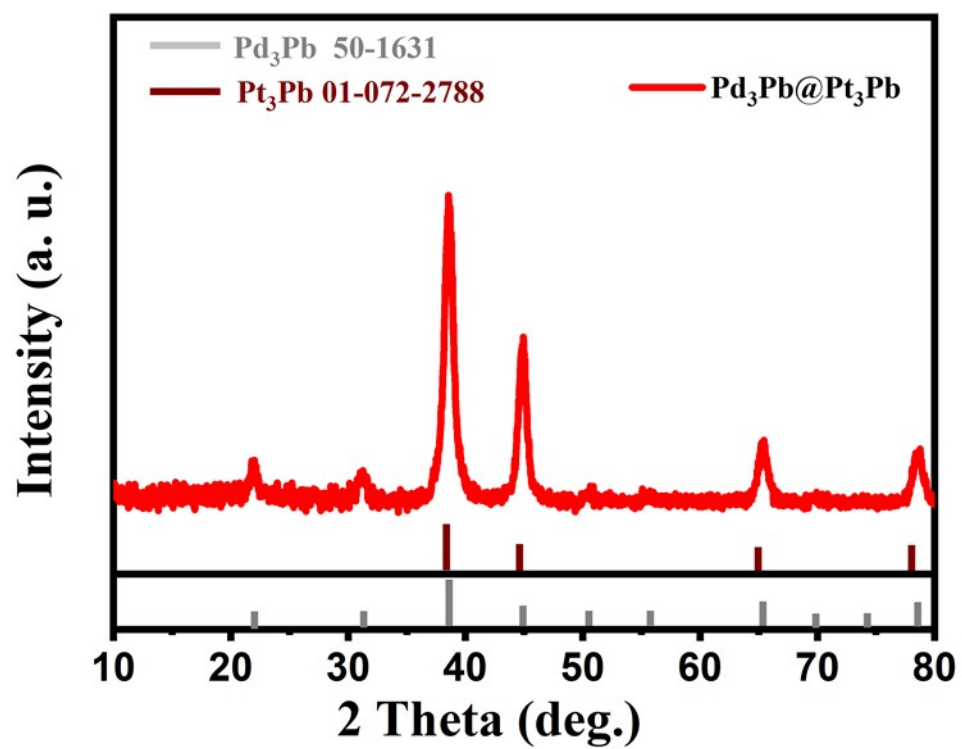

Fig. S2. XRD pattern of the Pd<sub>3</sub>Pb@Pt<sub>3</sub>Pb nanocubes.

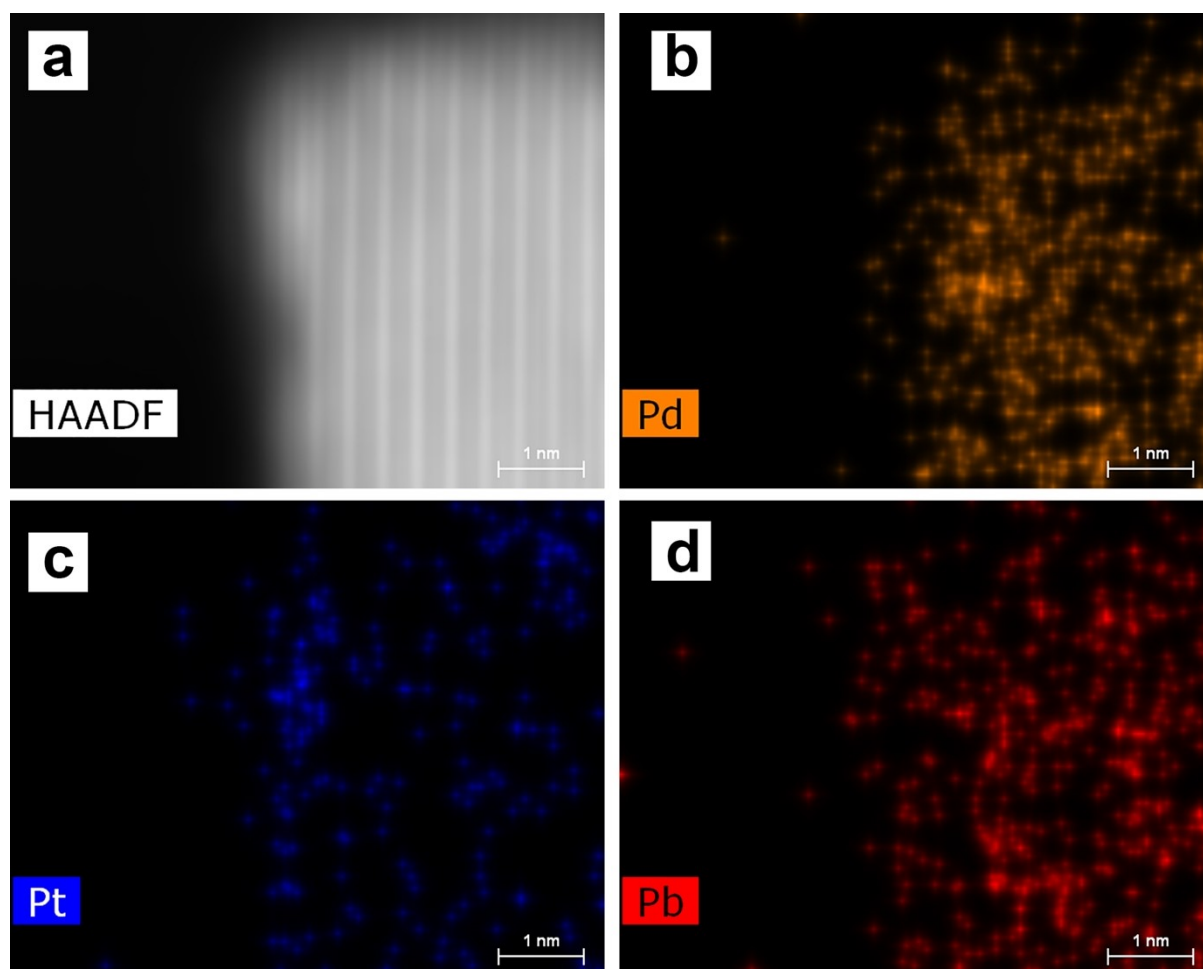

**Fig. S3.** High-magnified EDX mapping image of the surface of the Pd<sub>3</sub>Pb@Pt<sub>3</sub>Pb nanocubes.

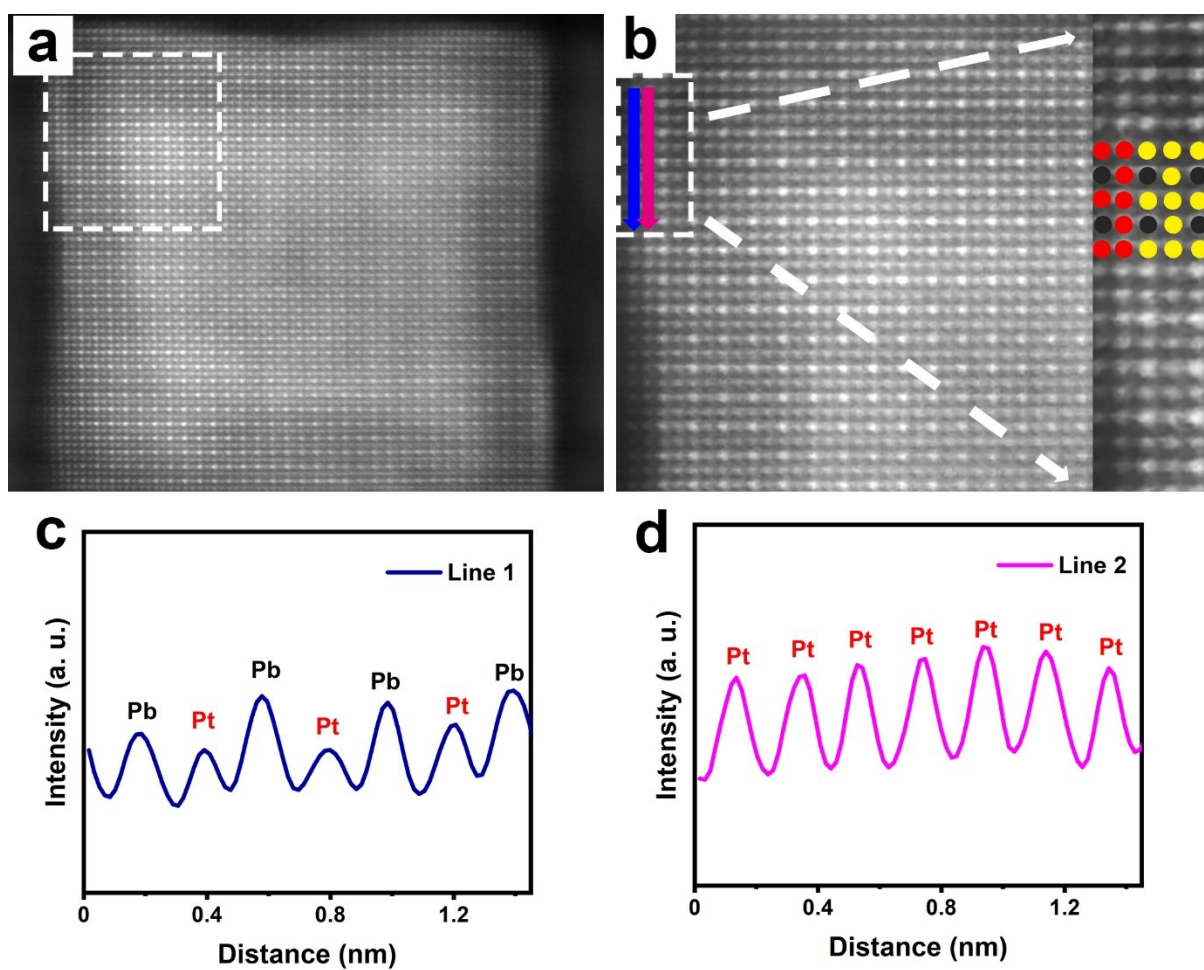

**Fig. S4.** (a,b) Aberration-corrected HAADF-STEM images of the  $\text{Pd}_3\text{Pb}@Pt_3\text{Pb}$  nanocubes and (c,d) corresponding line profiles of intensity of atoms along the directions marked in (b).

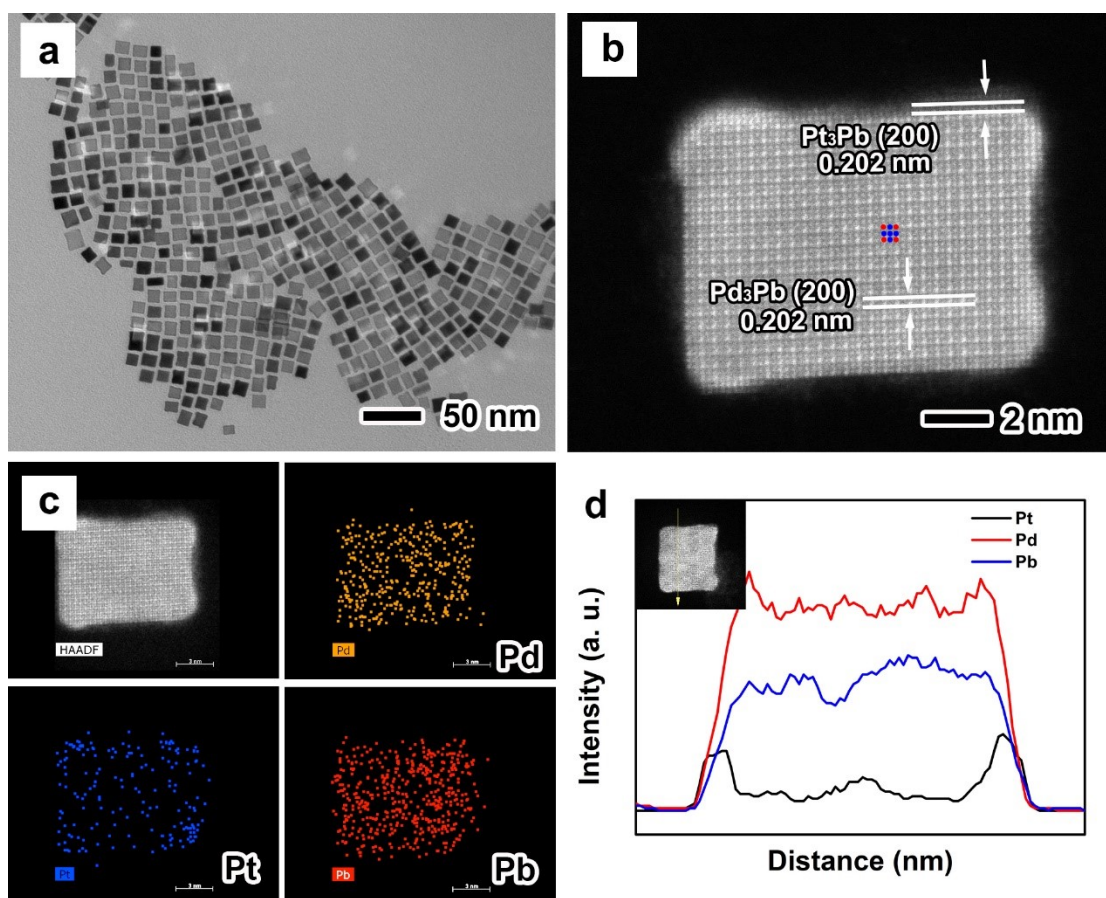

**Fig. S5.** (a) TEM image, (b) aberration-corrected HAADF-STEM image, (c) EDX mapping image and (d) line-scan profiles of the Pd<sub>3</sub>Pb@Pt<sub>4</sub>Pb nanocubes.



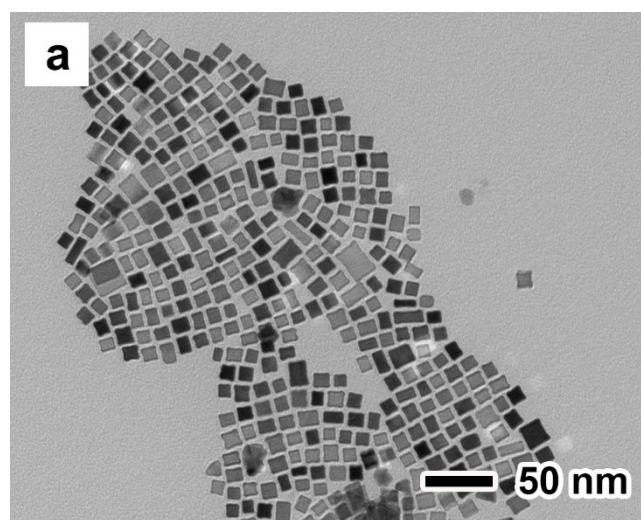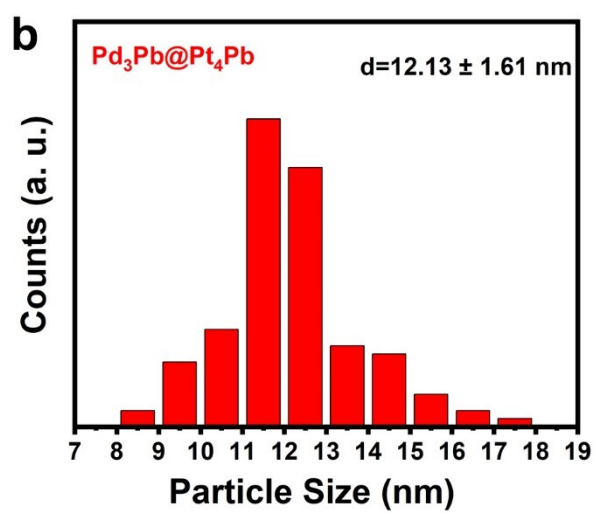

**Fig. S6.** (a) TEM image and (b) corresponding size distribution of the  $\text{Pd}_3\text{Pb}@\text{Pt}_4\text{Pb}$  nanocubes.

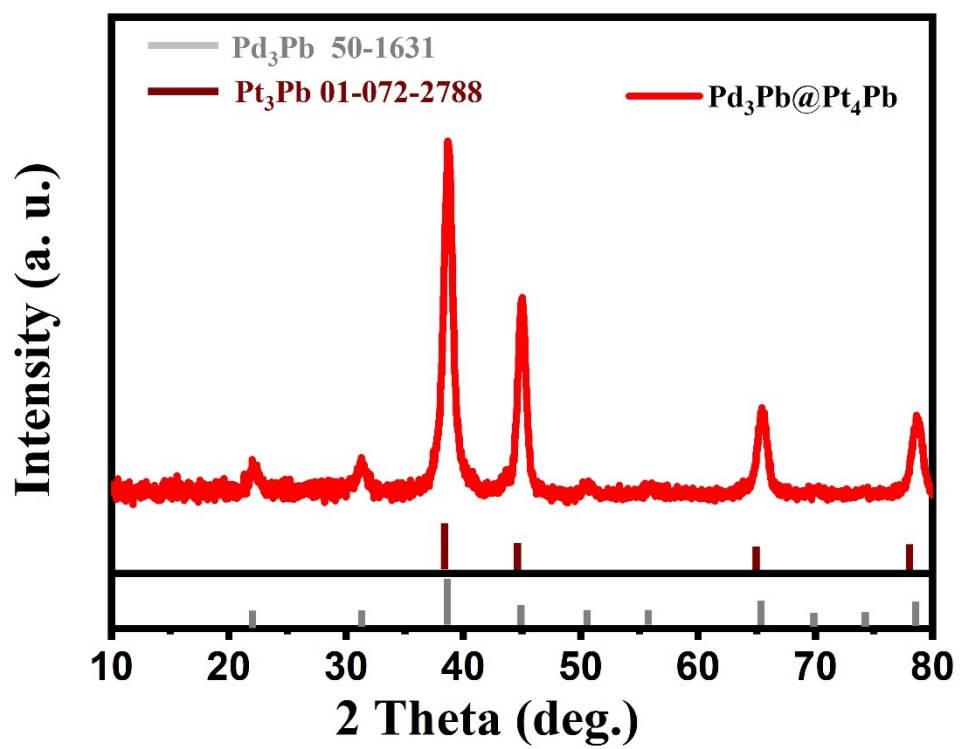

**Fig. S7.** XRD pattern of the Pd<sub>3</sub>Pb@Pt<sub>4</sub>Pb nanocubes.

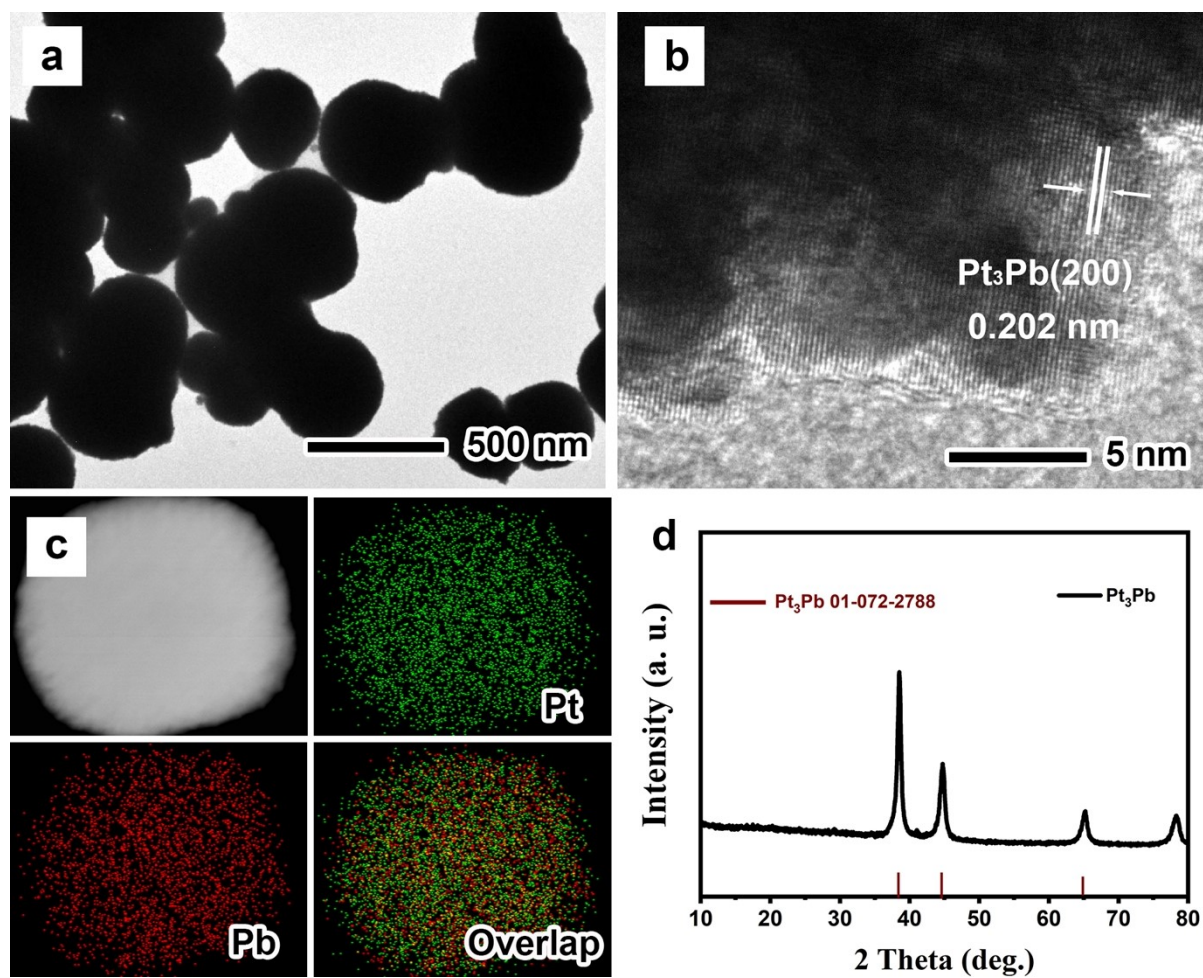

**Fig. S8.** (a) TEM image, (b) HRTEM image, (c) EDX mapping image and (d) XRD pattern of the Pt<sub>3</sub>Pb nanoparticles.

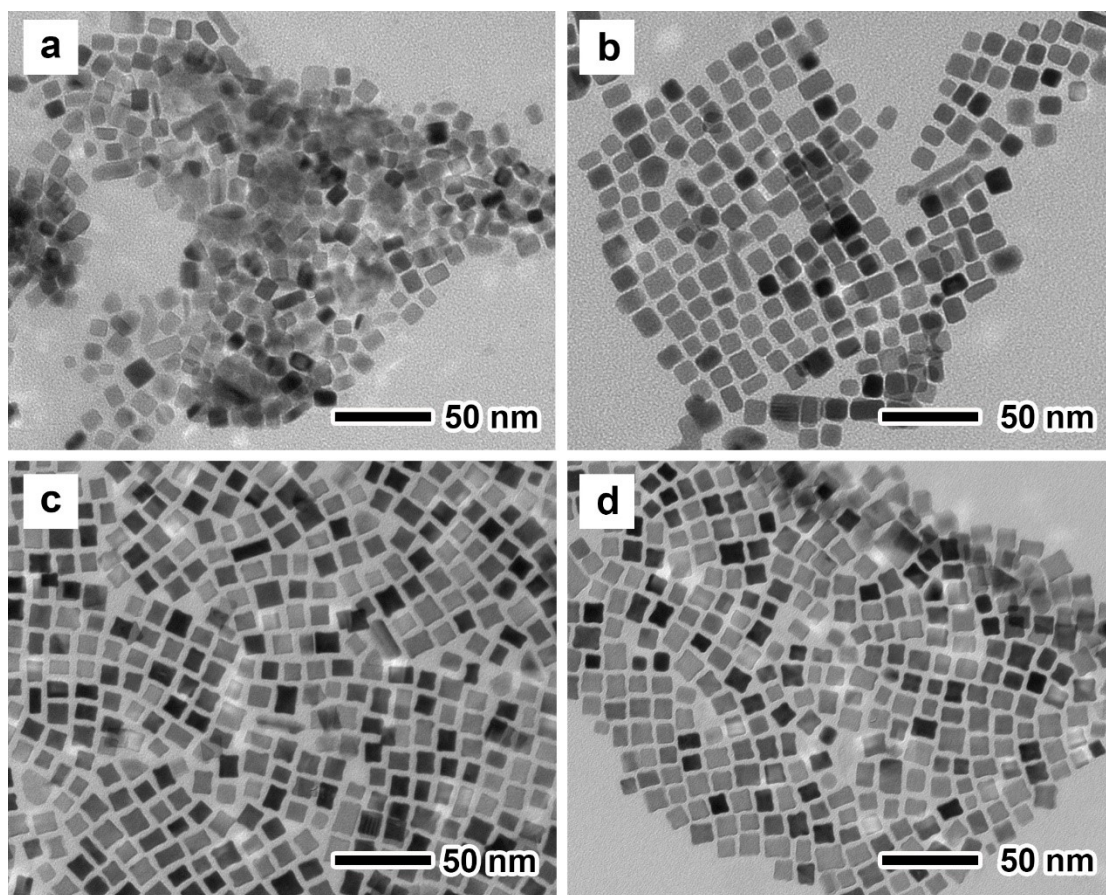

**Fig. S9.** TEM images of the Pd<sub>3</sub>Pb/Pt<sub>3</sub>Pb prepared using the standard procedure at different reaction times: (a) 3, (b) 5, (c) 10, and (d) 20 min.

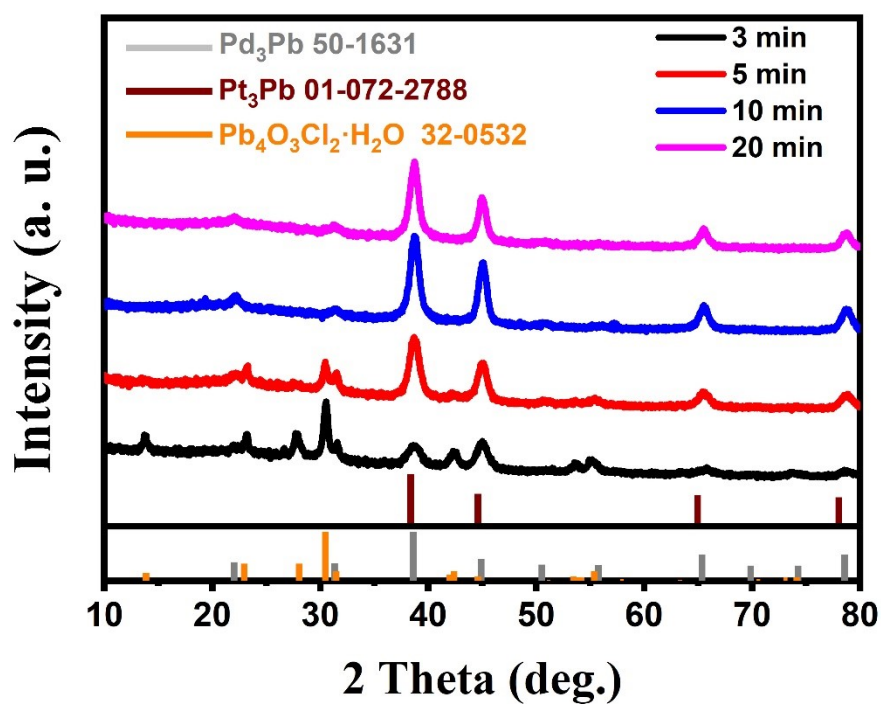

**Fig. S10.** XRD patterns of the  $\text{Pd}_3\text{Pb}@Pt_3\text{Pb}$  prepared using the standard procedure at different reaction times: (a) 3, (b) 5, (c) 10, and (d) 20 min.

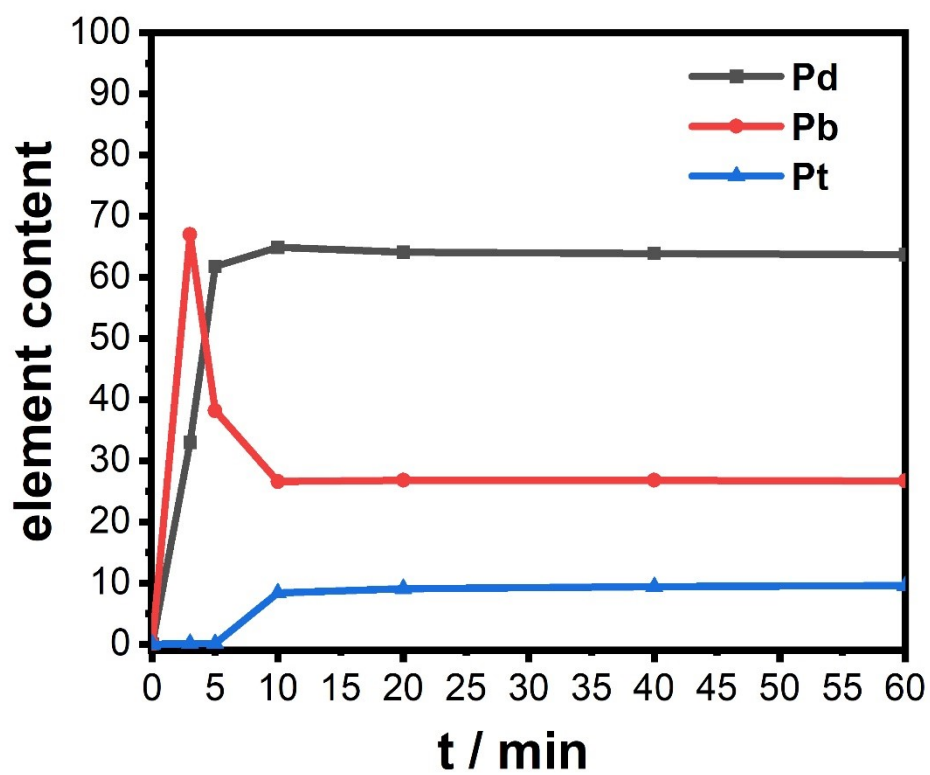

**Fig. S11.** Change in mol % of Pt, Pd and Pb during the reaction for the synthesis of the  $\text{Pd}_3\text{Pb}@\text{Pt}_3\text{Pb}$  nanocubes.



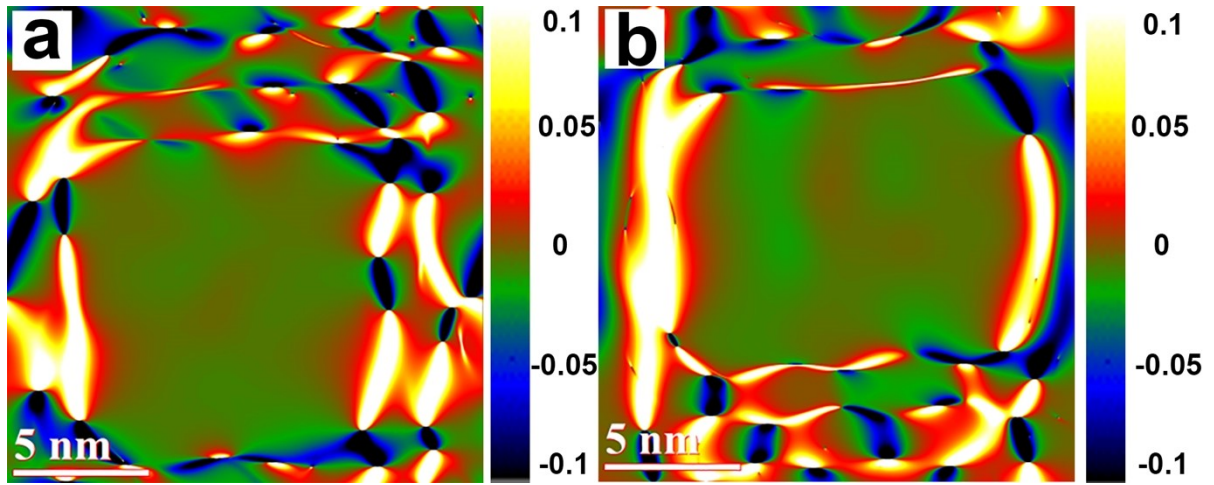

**Fig. S12.** Strain distribution determined by GPA. (a) Mapping image of  $\epsilon_{xx}$  distribution of Figure 2a. (b) Mapping image of  $\epsilon_{xx}$  distribution of Figure 13a

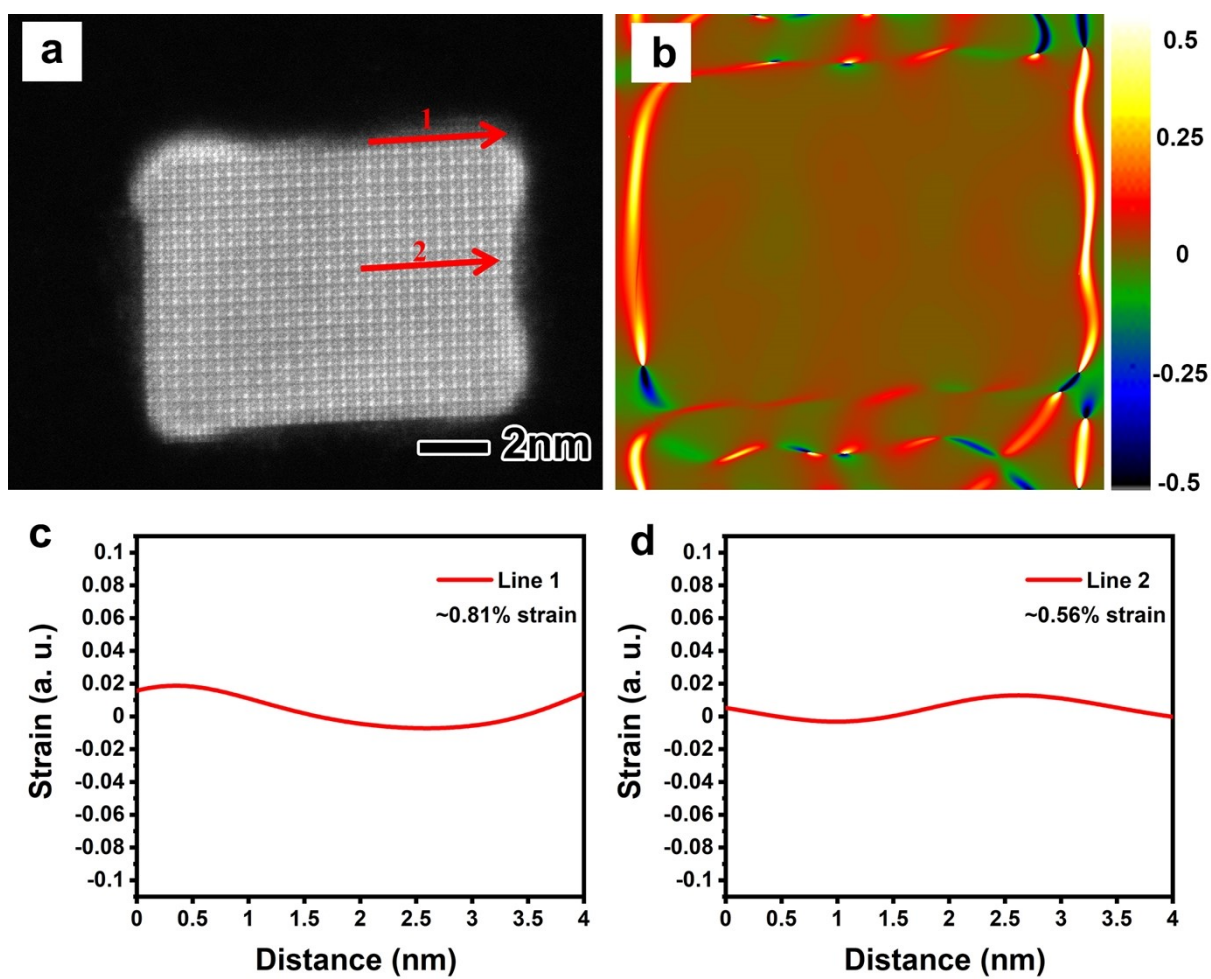

**Fig. S13.** Strain distribution of the Pd<sub>3</sub>Pb@Pt<sub>4</sub>Pb nanocubes determined by GPA. (a) Aberration-corrected HAADF-STEM image of a Pd<sub>3</sub>Pb@Pt<sub>4</sub>Pb nanocube. (b) Mapping image of  $\epsilon_{xx}$  distribution of (a). (c) and (d) Line profiles of  $\epsilon_{xx}$  along directions marked in (a).



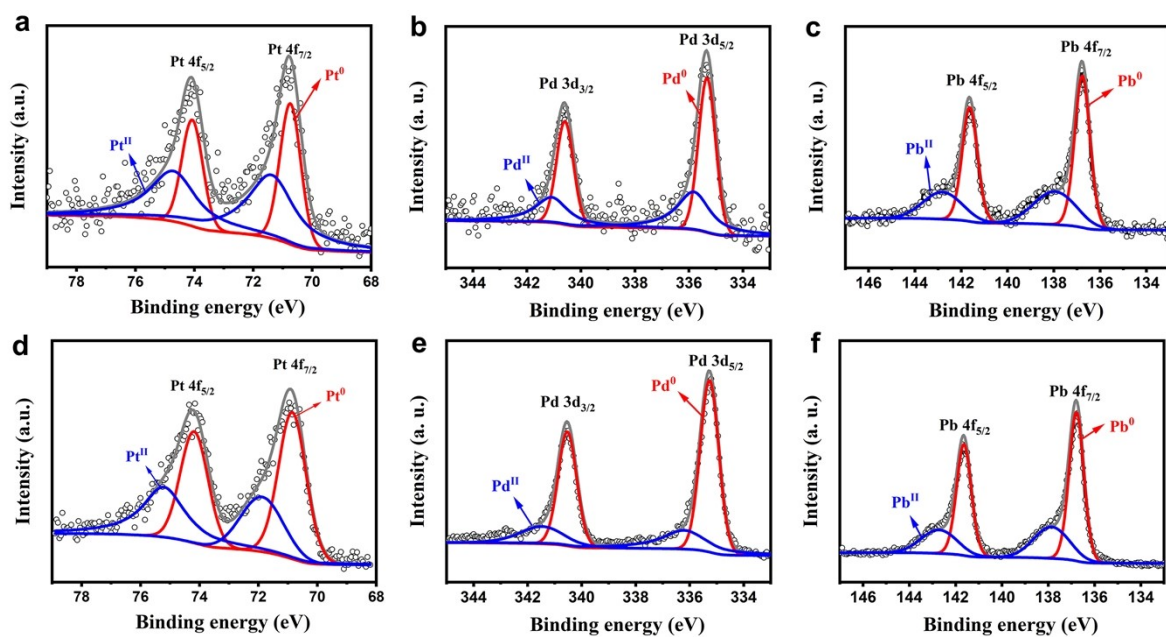

**Fig. S14.** (a, d) Pt 4f, (b, e) Pd 3d and (c, f) Pb 4f XPS spectra of the Pd<sub>3</sub>Pb@Pt<sub>3</sub>Pb and Pd<sub>3</sub>Pb@Pt<sub>4</sub>Pb nanocubes, respectively.

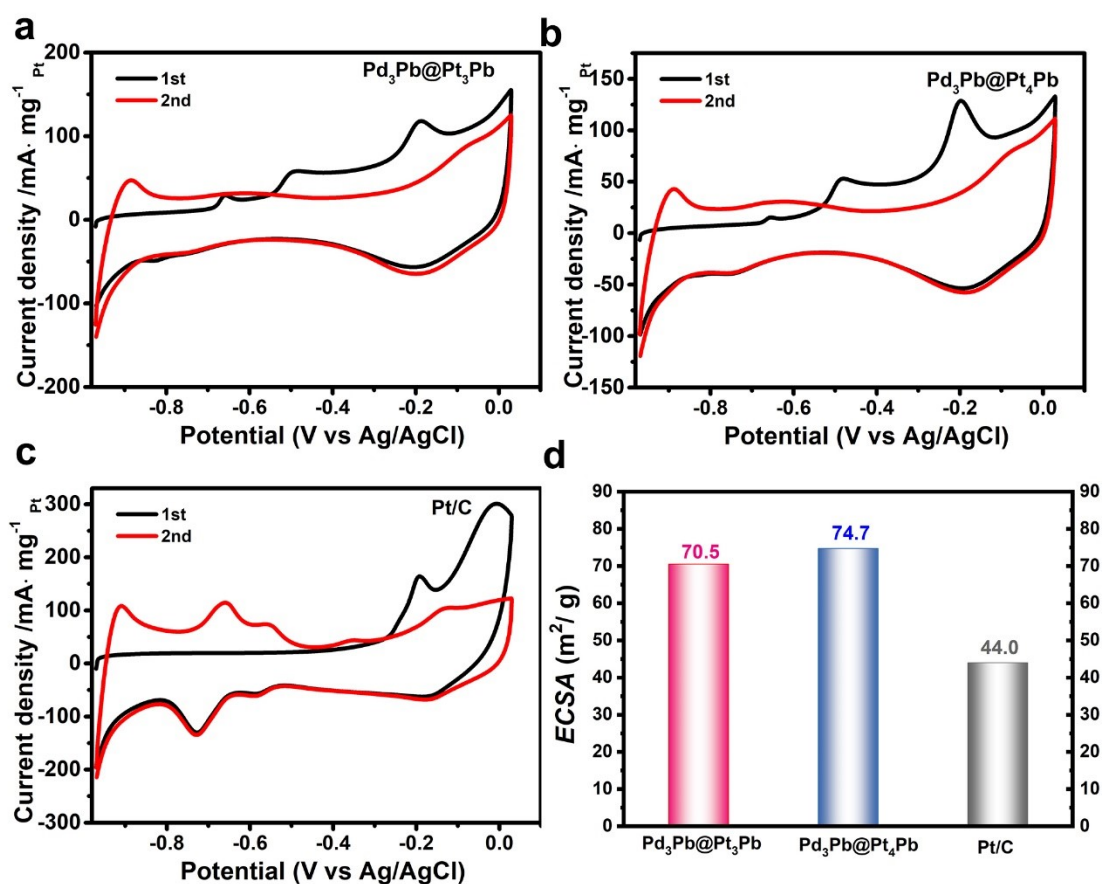

**Fig. S15.** CO stripping curves of three catalysts recorded in 0.1 M KOH solution at a sweep rate of 50 mV/s: (a) Pd<sub>3</sub>Pb@Pt<sub>3</sub>Pb nanocubes, (b) Pd<sub>3</sub>Pb@Pt<sub>4</sub>Pb nanocubes, and (c) Pt/C. (d) A comparison of ECSAs of these three catalysts.

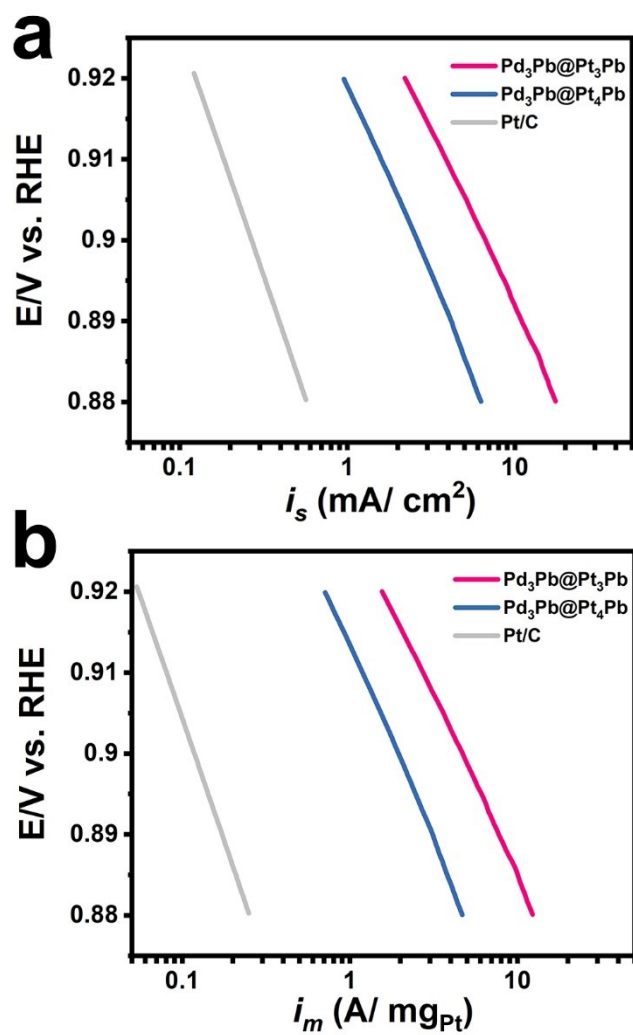

**Fig. S16.** (a) Area-specific ( $i_s$ , mA/cm<sup>2</sup>) and (b) mass ( $i_m$ , A/mg<sub>Pt</sub>) ORR activities for Pd<sub>3</sub>Pb@Pt<sub>3</sub>Pb nanocubes, Pd<sub>3</sub>Pb@Pt<sub>4</sub>Pb nanocubes and Pt/C reference catalysts.

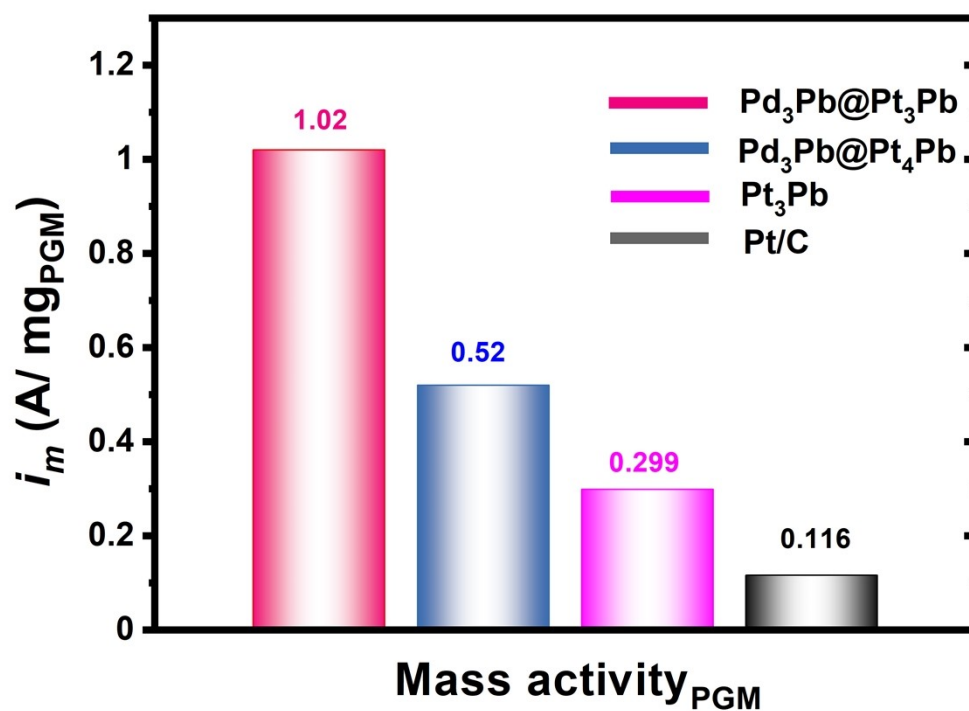

**Fig. S17.** Mass activities (normalized by the mass of PGM,  $i_m$ , A/mg<sub>PGM</sub>) of the Pd<sub>3</sub>Pb@Pt<sub>3</sub>Pb nanocubes, Pd<sub>3</sub>Pb@Pt<sub>4</sub>Pb nanocubes, Pt<sub>3</sub>Pb nanoparticles and commercial Pt/C catalysts for ORR.

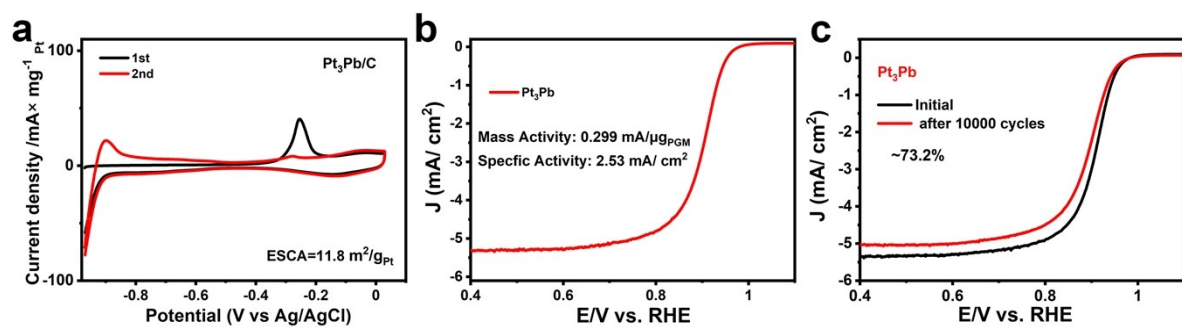

**Fig. S18.** (a) CO stripping curves, (b) mass ( $i_m$ , A/mg<sub>Pt</sub>) and area-specific ( $i_s$ , mA/cm<sup>2</sup>) activities, and (c) ORR polarization curves before and after 10000 cycles between 0.6 and 1.0 V at a scan rate of 100 mV/ s versus RHE of the Pt<sub>3</sub>Pb/C catalysts.

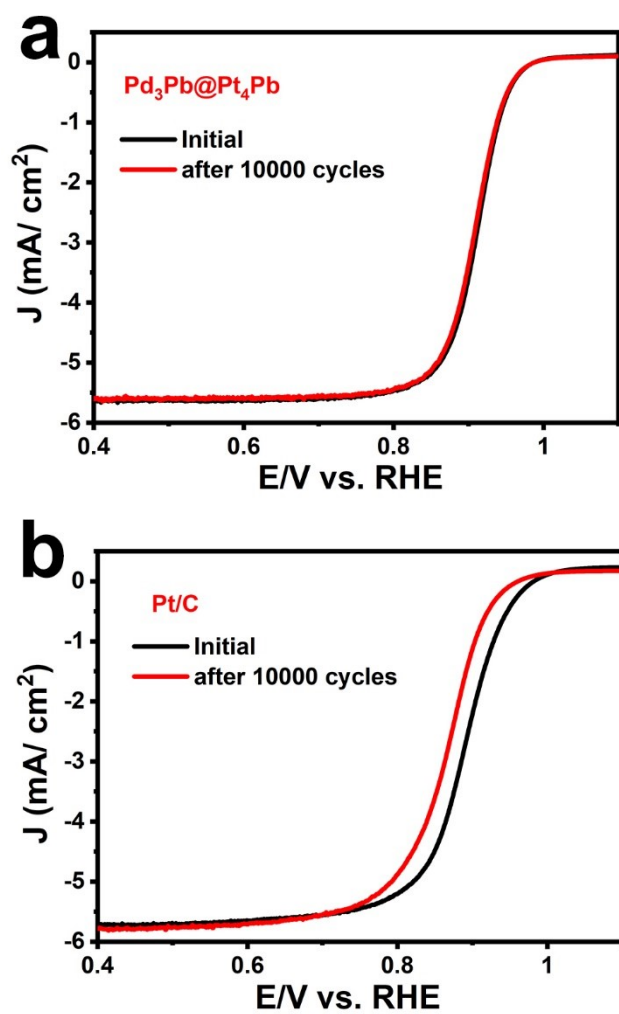

**Fig. S19.** ORR polarization curves of (a)  $\text{Pd}_3\text{Pb}@Pt_4\text{Pb}$  nanocubes/C and (b) commercial Pt/C catalysts before and after 10000 cycles between 0.6 and 1.0 V at a scan rate of 100 mV/ s versus RHE.

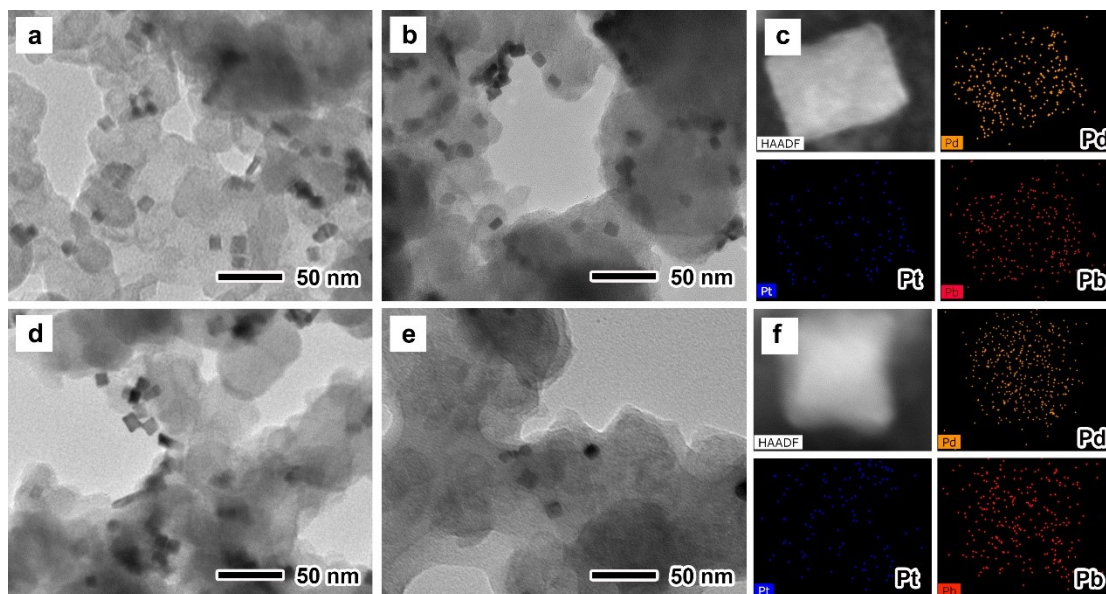

**Fig. S20.** TEM and HAADF-STEM-EDX mapping characterizations of (a-c) Pd<sub>3</sub>Pb@Pt<sub>3</sub>Pb nanocubes/C and (d-f) Pd<sub>3</sub>Pb@Pt<sub>4</sub>Pb nanocubes/C before and after 10000 cycles ADT test.

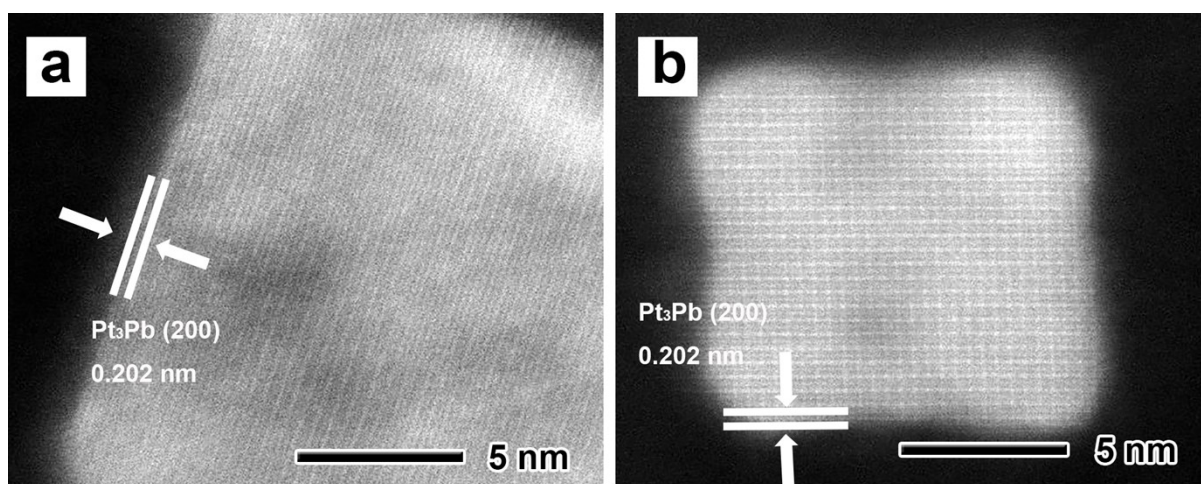

**Fig. S21.** HAADF-STEM images of (a,b) two  $\text{Pd}_3\text{Pb}@Pt_3\text{Pb}/\text{C}$  samples after ADT.



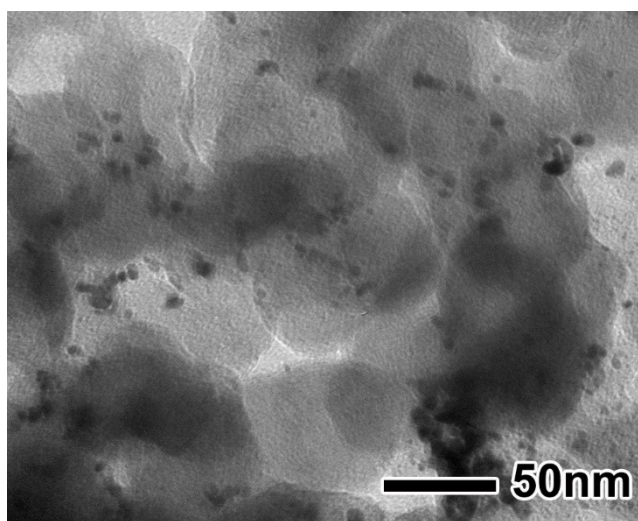

**Fig. S22.** TEM image of the commercial Pt/C catalyst after 10000 cycles ADT test.

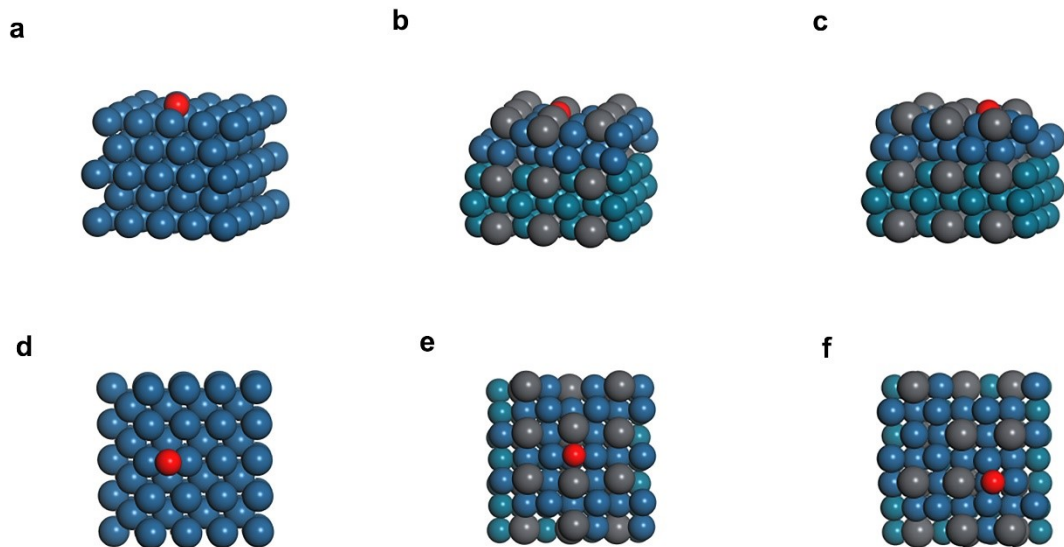

**Fig. S23.** DFT models of (a) Pt(100), (b) Pd<sub>3</sub>Pb@Pt<sub>3</sub>Pb(100), and (c) Pd<sub>3</sub>Pb@Pt<sub>4</sub>Pb(100).

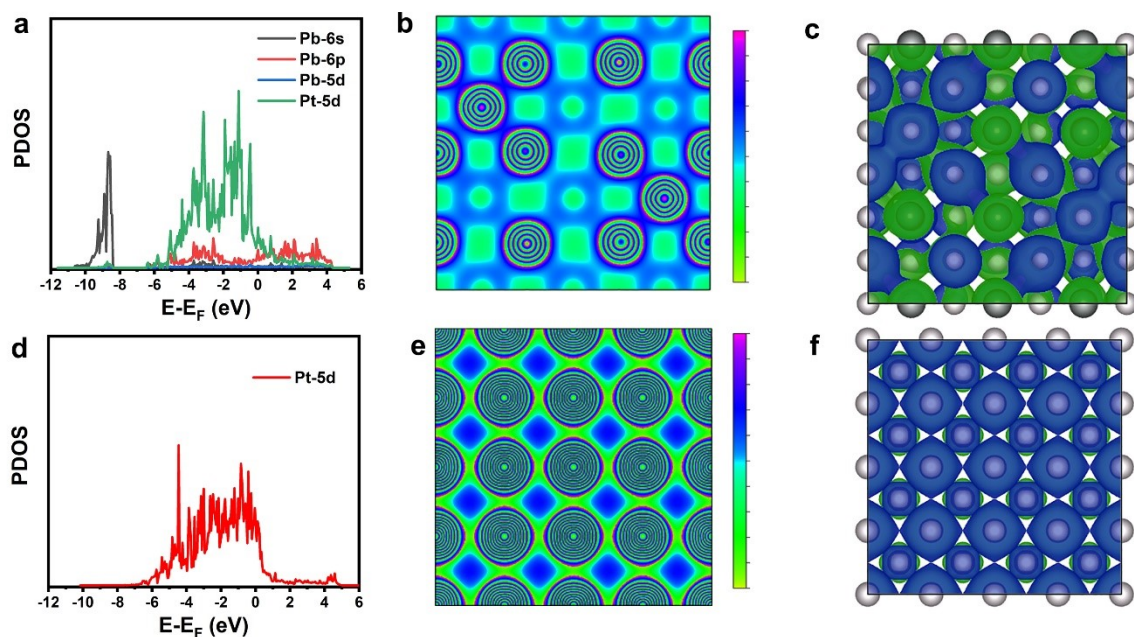

**Fig. S24.** DFT calculations. The PDOS of (a)  $\text{Pd}_3\text{Pb}@Pt_4\text{Pb}$  and (d) Pt slab. The electron localization function analysis of surface in (b)  $\text{Pd}_3\text{Pb}@Pt_4\text{Pb}$  slab and (e) Pt slab. The differential charge distributions for (c)  $\text{Pd}_3\text{Pb}@Pt_4\text{Pb}$  slab and (f) Pt slab.

**Table S1.** ICP-AES data of Pd<sub>3</sub>Pb@Pt<sub>3</sub>Pb and Pd<sub>3</sub>Pb@Pt<sub>4</sub>Pb nanocubes.

| <b>Samples</b>                           | <b>Atomic ratio of<br/>Pd %</b> | <b>Atomic ratio of<br/>Pt %</b> | <b>Atomic ratio of<br/>Pb %</b> | <b>Pt/Pb<sup>*</sup></b> |
|------------------------------------------|---------------------------------|---------------------------------|---------------------------------|--------------------------|
| <b>Pd<sub>3</sub>Pb@Pt<sub>3</sub>Pb</b> | 63.7                            | 9.6                             | 26.7                            | 3.1                      |
| <b>Pd<sub>3</sub>Pb@Pt<sub>4</sub>Pb</b> | 62.0                            | 12.1                            | 25.9                            | 4.1                      |
| <b>Pt<sub>3</sub>Pb</b>                  | /                               | 74.3                            | 25.7                            | 2.9                      |

\* Pt/Pb is defined as the atomic ratio of Pt and Pb after subtracting the amount of Pb in the Pd<sub>3</sub>Pb cores with a Pd/Pb atomic ratio of 2.7:1.

**Table S2.** Summarized XPS data of Pd<sub>3</sub>Pb@Pt<sub>3</sub>Pb, Pd<sub>3</sub>Pb@Pt<sub>4</sub>Pb, Pt bulk, Pb bulk and Pd bulk.

| Samples                                  | Pt <sup>0</sup> 4f <sub>7/2</sub> | Pt <sup>0</sup> 4f <sub>5/2</sub> | Pb <sup>0</sup> 4f <sub>7/2</sub> | Pb <sup>0</sup> 4f <sub>5/2</sub> | Pd <sup>0</sup> 3d <sub>5/2</sub> | Pd <sup>0</sup> 3d <sub>3/2</sub> | Pt/Pb |
|------------------------------------------|-----------------------------------|-----------------------------------|-----------------------------------|-----------------------------------|-----------------------------------|-----------------------------------|-------|
| <b>Pd<sub>3</sub>Pb@Pt<sub>3</sub>Pb</b> | 70.74 eV                          | 74.07 eV                          | 136.77 eV                         | 141.63 eV                         | 335.33 eV                         | 340.59 eV                         | 0.76  |
| <b>Pd<sub>3</sub>Pb@Pt<sub>4</sub>Pb</b> | 70.85 eV                          | 74.18 eV                          | 136.78 eV                         | 141.64 eV                         | 335.27 eV                         | 340.53 eV                         | 1.05  |
| <b>Pb bulk</b>                           | /                                 | /                                 | 136.90 eV                         | 141.76 eV                         | /                                 | /                                 | /     |
| <b>Pd bulk</b>                           | /                                 | /                                 | /                                 | /                                 | 335.1 eV                          | 340.36 eV                         | /     |
| <b>Pt bulk</b>                           | 71.20 eV                          | 74.53 eV                          | /                                 | /                                 | /                                 | /                                 | /     |

**Table S3.** Comparison of ORR performance of Pd<sub>3</sub>Pb@Pt<sub>3</sub>Pb in this work with state of art electrocatalysts in the literatures.

| <b>Samples</b>                                                  | <b><math>i_m</math><br/>(A/mg<sub>Pt</sub>)</b> | <b><math>i_s</math><br/>(mA/cm<sup>2</sup>)</b> | <b>Ref.</b> |
|-----------------------------------------------------------------|-------------------------------------------------|-------------------------------------------------|-------------|
| <b>Pd<sub>3</sub>Pb@Pt<sub>3</sub>Pb</b>                        | 4.69                                            | 6.69                                            | This work   |
| <b>Pt<sub>37</sub>Cu<sub>56</sub>Au<sub>7</sub> porous film</b> | 0.871                                           | 1.85                                            | 8           |
| <b>Pt–Pd binary superlattices</b>                               | ~2.1                                            | ~1.9                                            | 9           |
| <b>Pd<sub>72</sub>Pt<sub>28</sub> alloy</b>                     | /                                               | 1.249                                           | 10          |
| <b>H-Pt/CaMnO<sub>3</sub></b>                                   | 0.38<br>(0.85V)                                 | 1.06<br>(0.85V)                                 | 11          |
| <b>CuPt-NC</b>                                                  | 0.32                                            | 0.47                                            | 12          |
| <b>NiPt TONPs</b>                                               | 0.44                                            | 0.51                                            | 13          |
| <b>Pt-coated Pd nanocubes</b>                                   | /                                               | 0.708                                           | 14          |
| <b>Pt@Fe-N/R3DG</b>                                             | /                                               | 2.22                                            | 15          |
| <b>13% PtPdNT</b>                                               | 0.333                                           | 1.48                                            | 16          |

**Table S4.** Summarized  $E_{\text{ads+O}}$ ,  $E_{\text{slab}}$ ,  $E_{\text{O}}$ , and  $\Delta E_{\text{O}}$  for three kinds of surfaces including *fcc*-structured  $\text{Pd}_3\text{Pb@Pt}_4\text{Pb}(100)$ ,  $\text{Pd}_3\text{Pb@Pt}_3\text{Pb}(100)$ , and  $\text{Pt}(100)$  obtained by DFT calculations.

| Samples                                                     | $E_{\text{slab+O}}$<br>(eV) | $E_{\text{slab}}$ (eV) | $E_{\text{O}}$ (eV) | $\Delta E_{\text{O}}$ (eV) |
|-------------------------------------------------------------|-----------------------------|------------------------|---------------------|----------------------------|
| <b>Pt(100)</b>                                              | -417.19                     | -411.39                | -7.16               | 1.36                       |
| <b><math>\text{Pd}_3\text{Pb@Pt}_4\text{Pb}(100)</math></b> | -416.40                     | -410.62                | -7.16               | 1.38                       |
| <b><math>\text{Pd}_3\text{Pb@Pt}_3\text{Pb}(100)</math></b> | -414.29                     | -408.58                | -7.16               | 1.45                       |

**Table S5.** Summarized position of d-band center for three kinds of surfaces including *fcc*-structured  $\text{Pd}_3\text{Pb@Pt}_4\text{Pb}(100)$ ,  $\text{Pd}_3\text{Pb@Pt}_3\text{Pb}(100)$ , and  $\text{Pt}(100)$  obtained by DFT calculations.

| Samples                                                     | $E-E_{\text{F}}$ (eV) |
|-------------------------------------------------------------|-----------------------|
| <b>Pt(100)</b>                                              | -1.909                |
| <b><math>\text{Pd}_3\text{Pb@Pt}_4\text{Pb}(100)</math></b> | -2.051                |
| <b><math>\text{Pd}_3\text{Pb@Pt}_3\text{Pb}(100)</math></b> | -2.077                |

### 3. References

- [1] G. Kresse and J. Furthmüller, *Phys. Rev. B* **1996**, *54*, 11169–11186.
- [2] G. Kresse and J. Hafner, *Phys. Rev. B* **1994**, *49* 14251–14269.
- [3] P. Blöchl, *Phys. Rev. B* **1994**, *50*, 17953–17979.
- [4] J. Perdew, K. Burke and M. Ernzerhof, *Phys. Rev. Lett.* **1996**, *77*, 3865–3868.
- [5] Y. Zhang and W. Yang, *Phys. Rev. Lett.* **1998**, *80*, 890.
- [6] B. Hammer, L. Hansen and J. Nørskov, *Phys. Rev. B* **1999**, *59*, 7413–7421.
- [7] H. Monkhorst and J. Pack, *Phys. Rev. B* **1976**, *13*, 5188.
- [8] Y. Xie, Y. Yang, D. Muller, H. Abruña, N. Dimitrov and J. Fang, *ACS Catal.* **2020**, *10*, 9967–9976.
- [9] Y. Kang, X. Ye, J. Chen, Y. Cai, R. Diaz, R. Adzic, E. Stach and C. Murray, *J. Am. Chem. Soc.* **2013**, *135*, 42–45.
- [10] K. Jukk, N. Kongi, K. Tammeveski, J. Solla-Gullón and J. Feliu, *ChemElectroChem* **2017**, *4*, 2547–2555.
- [11] X. Han, F. Cheng, T. Zhang, J. Yang, Y. Hu and J. Chen, *Adv. Mater.* **2014**, *26*, 2047–2051.
- [12] V. Dhavale and S. Kurungot, *ACS Catal.* **2015**, *5*, 1445–1452.
- [13] T. Xia, J. Liu, S. Wang, C. Wang, Y. Sun, L. Gu and R. Wang, *ACS Appl. Mater. Interfaces* **2016**, *8*, 10841–10849.
- [14] C. Lee, C. Yang, C. Liu, Z. Liu and J. Ye, *J. Power Sources* **2014**, *268*, 712–717.
- [15] Y. Qin, L. Chao, J. He, Y. Liu, F. Chu, J. Cao, Y. Kong and Y. Tao, *J. Power Sources* **2016**, *335*, 31–37.
- [16] S. John, R. Atkinson III, O. Dyck, C. Sun, T. Zawodzinski Jr, and A. Papandrew, *Chem. Commun.* **2015**, *51*, 16633–16636.
